# Supplementary material for: tert-Butyl-substituted bicarbazole as a bipolar host material for efficient green and yellow PhOLEDs
Source: Royal Society of Chemistry journal article supplement (doi:10.1039/d0nj01210f), 2020-01-01
Supplement: d0nj01210f1.pdf [file d0nj01210f1.pdf]

## Electronic Supplementary Information

### **Tert-butyl-substituted bicarbazole as bipolar host material for efficient green and yellow PhOLEDs**

Dandan Zhou,<sup>‡a</sup> Bingqian Zhang,<sup>‡b</sup> Zhenyi Yu,<sup>a</sup> Qing Liao<sup>b</sup> and Hongbing Fu<sup>\*ab</sup>

<sup>a</sup> School of Science, Tianjin University, Tianjin 300072, P. R. China.

<sup>b</sup> Beijing Key Laboratory for Optical Materials and Photonic Devices, Department of Chemistry, Capital Normal University, Beijing 100048, P. R. China.

### **Table of Contents**

1. Crystal data
2. <sup>1</sup>H and <sup>13</sup>C NMR spectra
3. XRD data
4. Solvation
5. MS-MALDI spectra
6. DSC curve
7. Devices performance

**Table S1** Crystal data of compound **tcaz-tcaz**

| Identification code                      | <b>tcaz-tcaz</b>                                              |
|------------------------------------------|---------------------------------------------------------------|
| Empirical formula                        | C <sub>40</sub> H <sub>48</sub> N <sub>2</sub>                |
| Formula weight                           | 556.80                                                        |
| Temperature/K                            | 128.15                                                        |
| Crystal system                           | orthorhombic                                                  |
| Space group                              | Pccn                                                          |
| a/Å                                      | 21.0420(9)                                                    |
| b/Å                                      | 15.9328(7)                                                    |
| c/Å                                      | 10.1429(5)                                                    |
| α/°                                      | 90                                                            |
| β/°                                      | 90                                                            |
| γ/°                                      | 90                                                            |
| Volume/Å <sup>3</sup>                    | 3400.5(3)                                                     |
| Z                                        | 4                                                             |
| ρ <sub>calc</sub> g/cm <sup>3</sup>      | 1.088                                                         |
| μ/mm <sup>-1</sup>                       | 0.062                                                         |
| F(000)                                   | 1208.0                                                        |
| Crystal size/mm <sup>3</sup>             | 0.22 × 0.18 × 0.16                                            |
| Radiation                                | MoKα (λ = 0.71073)                                            |
| Index ranges                             | -26 ≤ h ≤ 26, -19 ≤ k ≤ 19, -12 ≤ l ≤ 12                      |
| Reflections collected                    | 28676                                                         |
| Independent reflections                  | 3486 [R <sub>int</sub> = 0.0616, R <sub>sigma</sub> = 0.0338] |
| Data/restraints/parameters               | 3486/57/228                                                   |
| Goodness-of-fit on F <sup>2</sup>        | 1.038                                                         |
| Final R indexes [I >= 2σ (I)]            | R <sub>1</sub> = 0.0516, wR <sub>2</sub> = 0.1242             |
| Final R indexes [all data]               | R <sub>1</sub> = 0.0673, wR <sub>2</sub> = 0.1343             |
| Largest diff. peak/hole/eÅ <sup>-3</sup> | 0.22/-0.18                                                    |

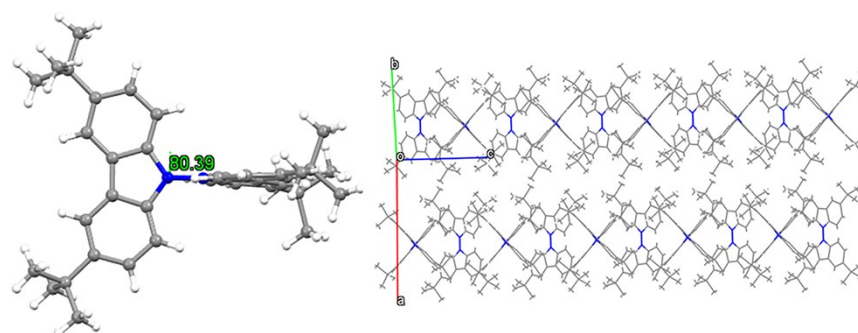**Fig. S1.** Crystal structure and molecular packing of **tcaz-tcaz**.

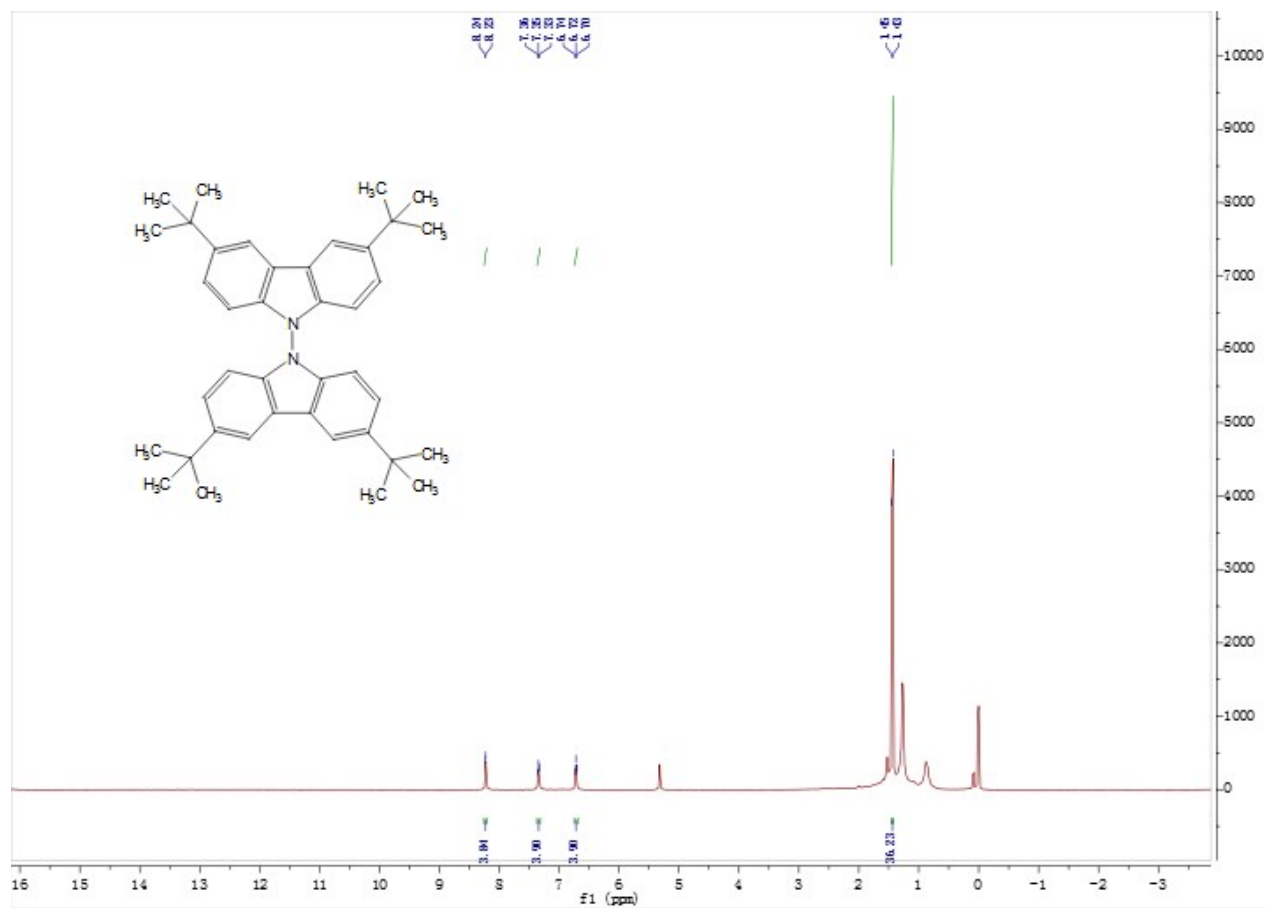

**Fig. S2.**  $^1\text{H}$  NMR spectrum for tcaz-tcaz (400 MHz, dichloromethane- $\text{d}_2$ ).

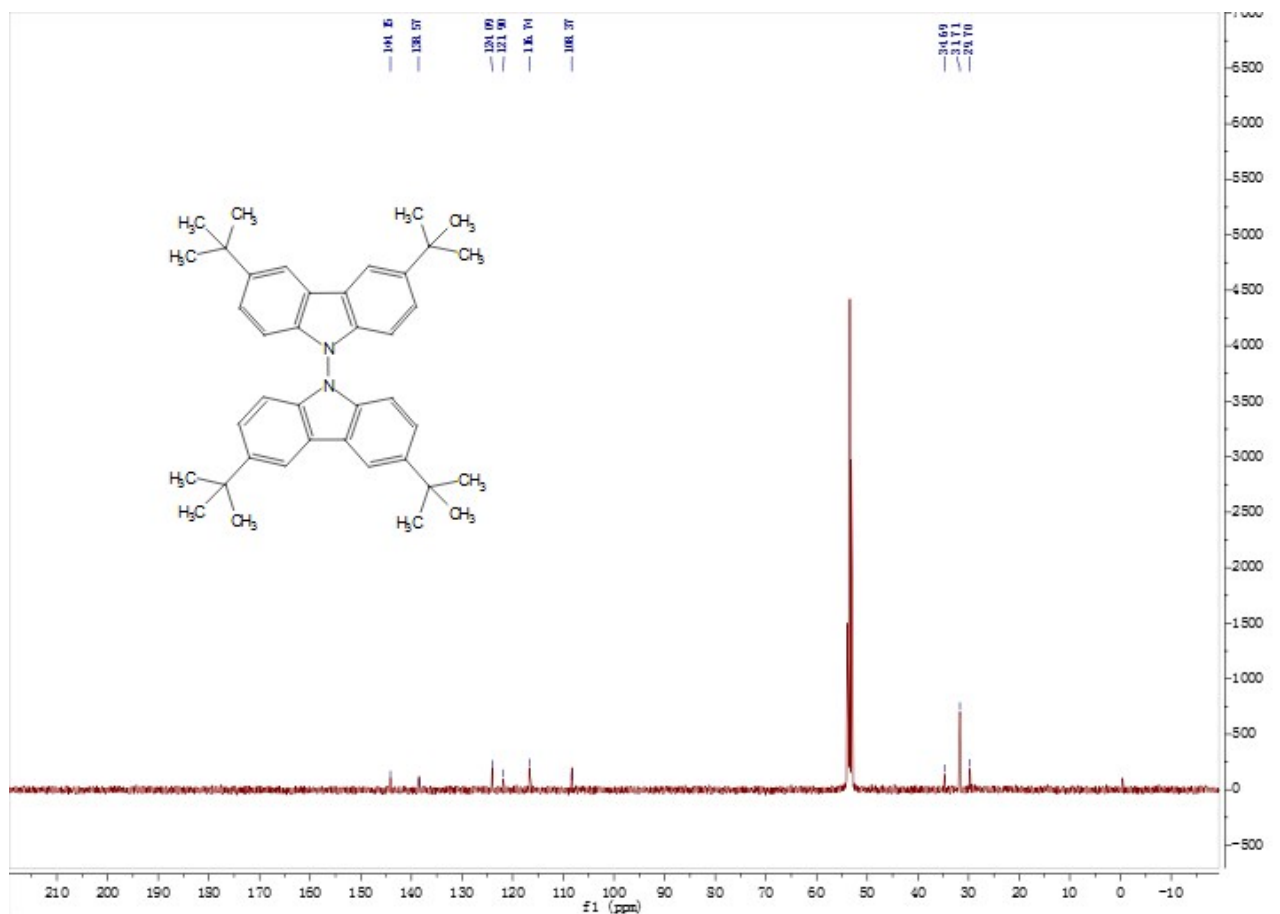

**Fig. S3.** <sup>13</sup>C NMR spectrum for tcaz-tcaz (400 MHz, dichloromethane-d<sub>2</sub>).

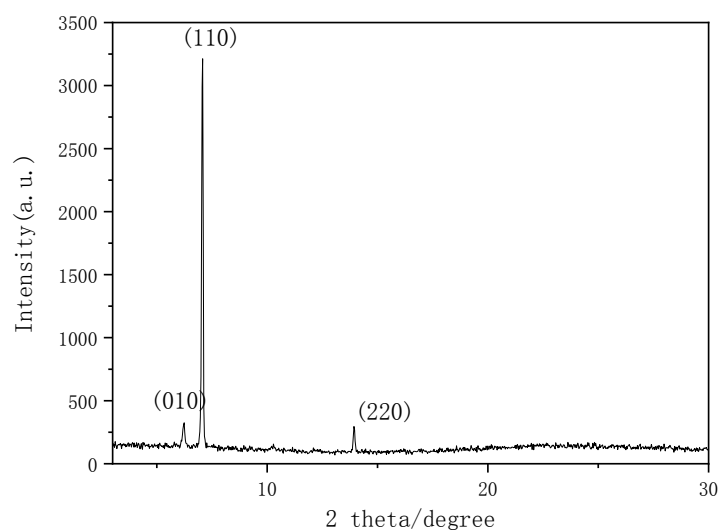

**Fig. S4.** XRD data of **tcaz-tcaz** crystal.

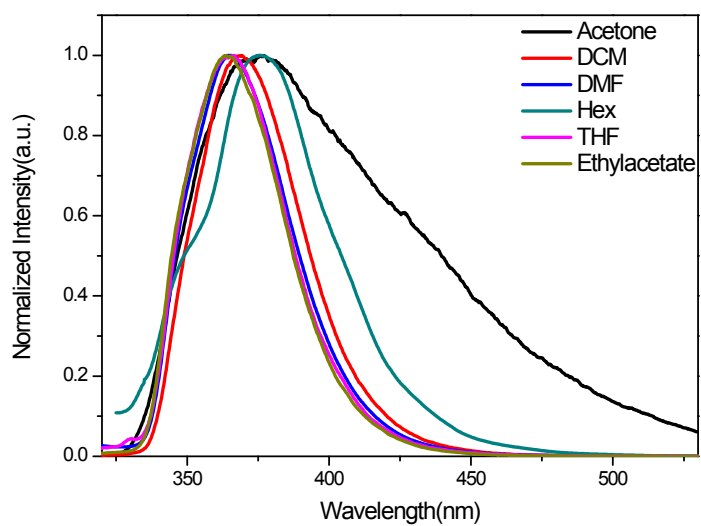

**Fig. S5.** PL Spectra of **tcaz-tcaz** in different solvents.

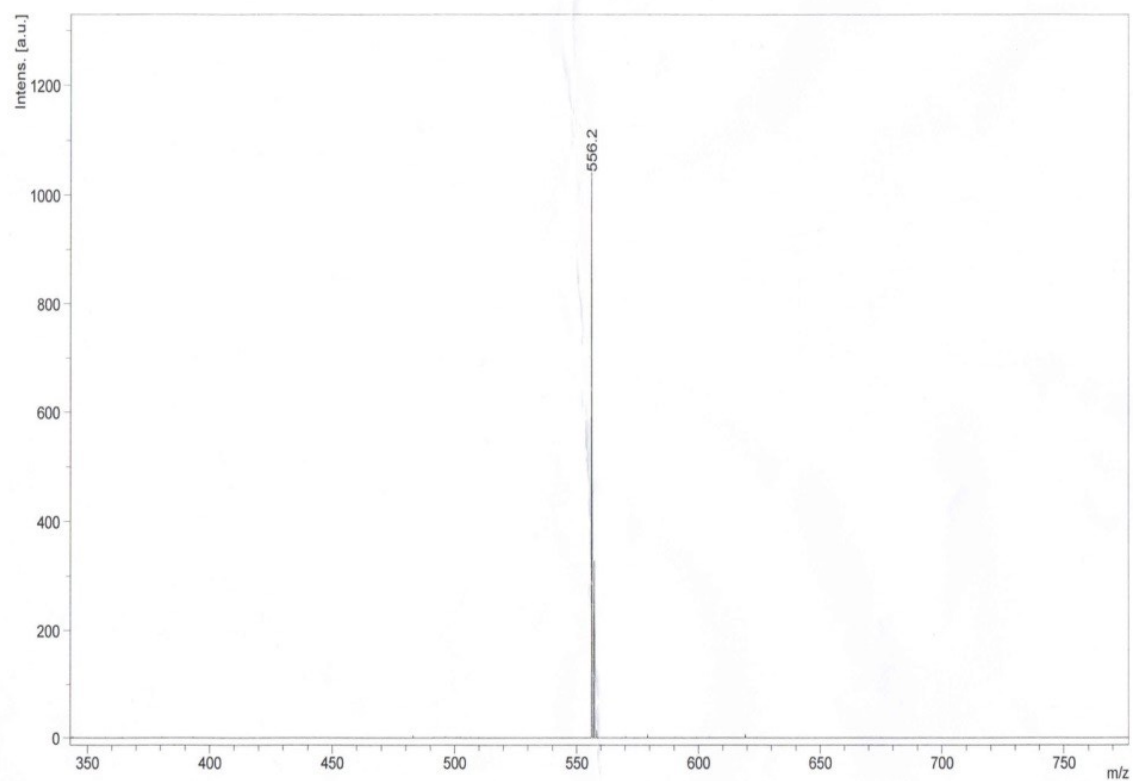

**Fig. S6.** MALDI-MS spectrum of **tcaz-tcaz**.

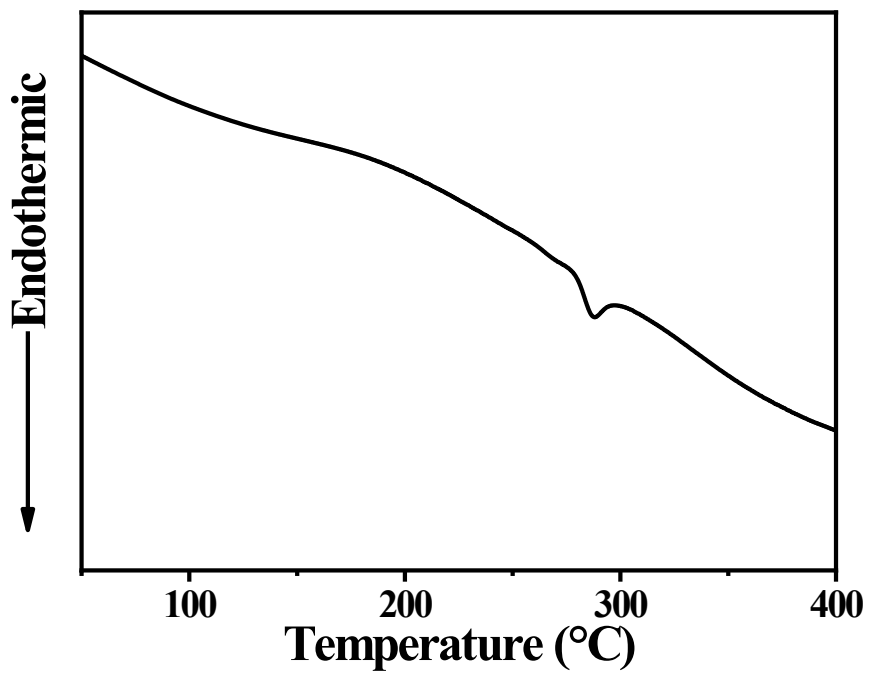

**Fig. S7.** The DSC curve of tcaz-tcaz.

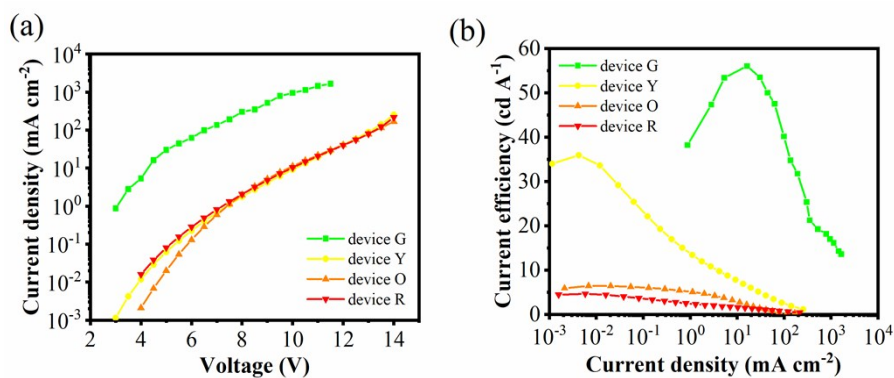

**Fig. S8.** (a) Current density *versus* voltage and (b) current efficiency *versus* current density characteristics of the devices.

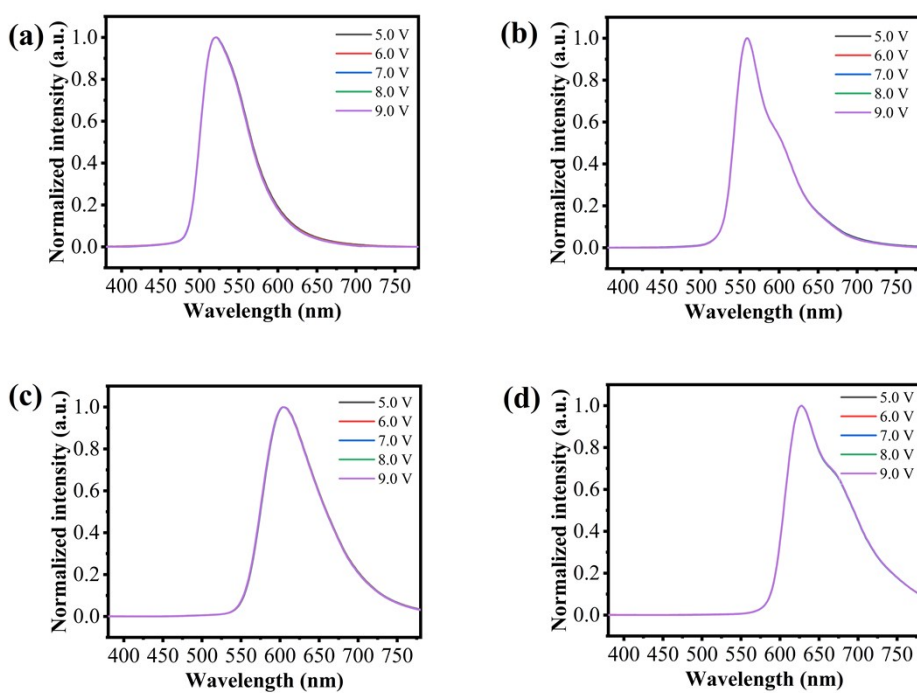

**Fig. S9.** EL spectra for the PhOLEDs with (a) green, (b) yellow, (c) orange and (d) red dopants at different driving voltages.



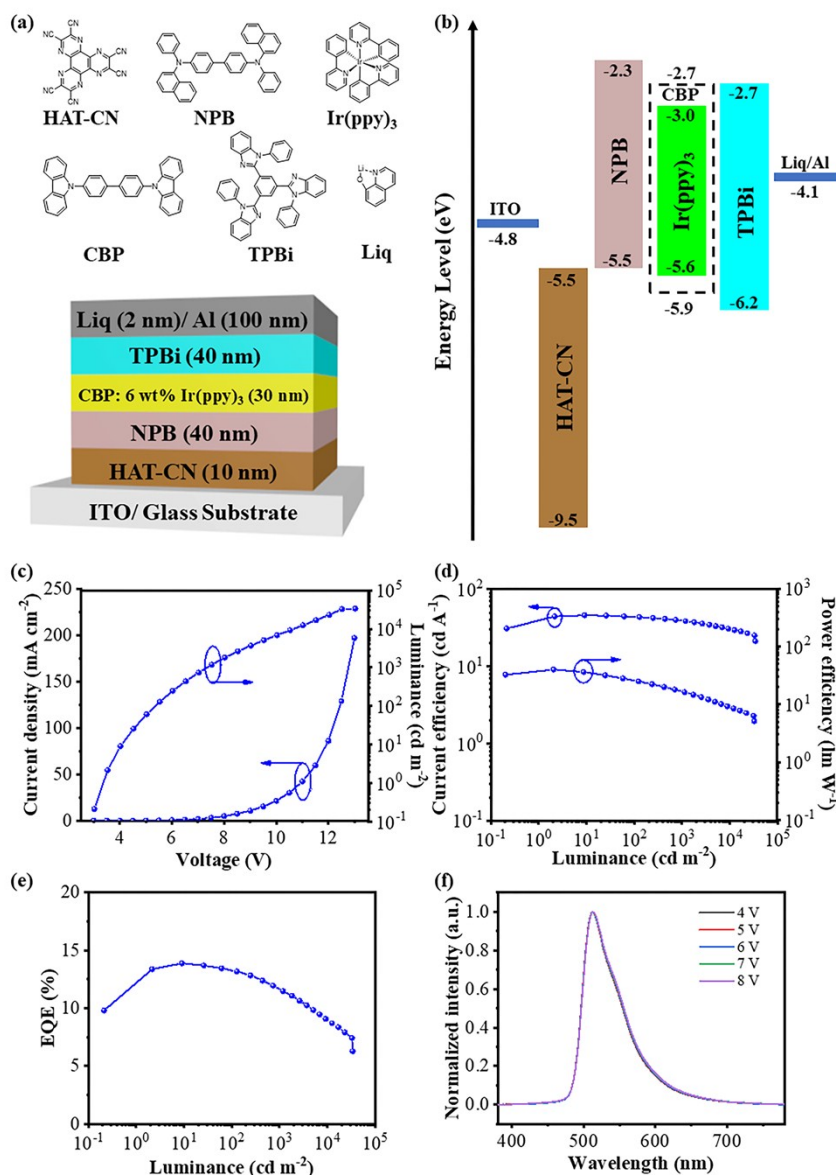

**Fig. S10** (a-b) Schematic structure and chemical structures of the compounds used in the devices and energy level diagrams of the fabricated PhOLEDs. (c-e) Voltage *versus* luminance, power efficiency *versus* current density, and external quantum efficiency *versus* voltage characteristics and (f) EL spectra of the devices at different driving voltages.

**Table S2** Summarised EL performance of the **CBP**-hosted device, compared with the **tcz-tcaz**-hosted device.

| Host     | Dopant               | $V_{on}^a$<br>(V) | $L_{max}^b$<br>(cd m <sup>-2</sup> ) | CE <sup>c</sup><br>(cd A <sup>-1</sup> ) | PE <sup>d</sup><br>(lm W <sup>-1</sup> ) | EQE <sub>max</sub> <sup>e</sup><br>(%) | $\lambda^f$<br>(nm) | CIE colour <sup>g</sup> |
|----------|----------------------|-------------------|--------------------------------------|------------------------------------------|------------------------------------------|----------------------------------------|---------------------|-------------------------|
| CBP      | Ir(ppy) <sub>3</sub> | 3.5               | 33880                                | 45.4                                     | 36.2                                     | 13.7                                   | 512                 | (0.28, 0.62)            |
| tcz-tcaz |                      | 2.4               | 22460                                | 56.1                                     | 40.0                                     | 15.5                                   | 522                 | (0.30, 0.63)            |

<sup>a</sup> Turn-on voltage recorded at 1 cd m<sup>-2</sup>. <sup>b</sup> Maximum luminance. <sup>c</sup> Maximum current efficiency. <sup>d</sup> Maximum power efficiency. <sup>e</sup> Maximum external quantum efficiency. <sup>f</sup> EL peak wavelength. <sup>g</sup> CIE refers to Commission International de l'Éclairage coordinates at 8 V.

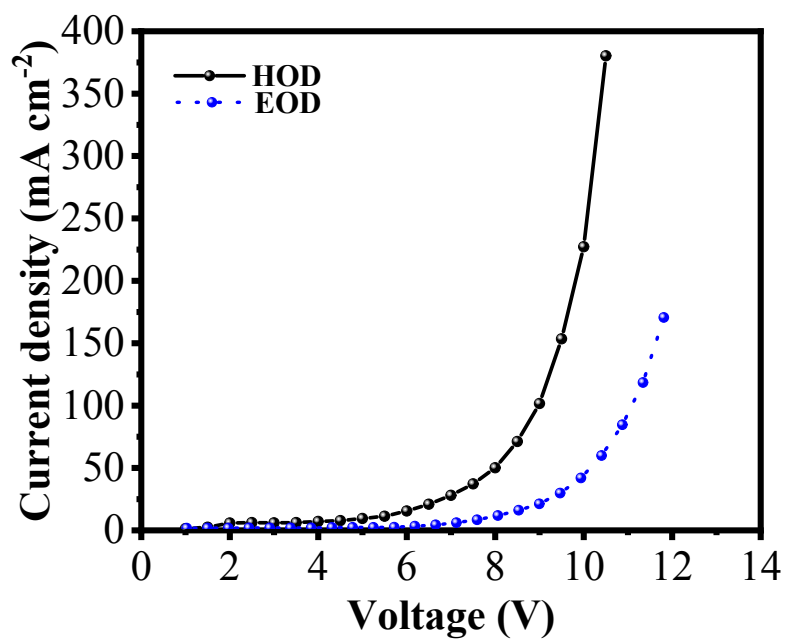

**Fig. S11** Current density *versus* voltage characteristics of the HOD and EOD of **CBP**.
